# Supplementary material for: A roadmap for breeding orphan leafy vegetable species: a case study of Gynandropsis gynandra (Cleomaceae)
Source: PubMed Central journal article supplement (PMC5798814; doi:10.1038/s41438-017-0001-2), 2018-01-10
Supplement: 41438_2017_1_MOESM1_ESM.pdf [file 41438_2017_1_MOESM1_ESM.pdf]

## *Gynandropsis gynandra* specimen collection form

|                                                                                                                                                                                                                                                                                                                                                                                    |  |                  |                                                                                            |                              |  |
|------------------------------------------------------------------------------------------------------------------------------------------------------------------------------------------------------------------------------------------------------------------------------------------------------------------------------------------------------------------------------------|--|------------------|--------------------------------------------------------------------------------------------|------------------------------|--|
| Date (dd-mm-yy)                                                                                                                                                                                                                                                                                                                                                                    |  | Collection No:   |                                                                                            | Part(s) and amount collected |  |
| Collectors:                                                                                                                                                                                                                                                                                                                                                                        |  |                  |                                                                                            | Photo No(s).                 |  |
| Collecting institute(s)                                                                                                                                                                                                                                                                                                                                                            |  |                  |                                                                                            | Country:                     |  |
| Region/ County                                                                                                                                                                                                                                                                                                                                                                     |  | Ward or location |                                                                                            | Village:                     |  |
| Site description (e.g name, distance and direction from nearest town)                                                                                                                                                                                                                                                                                                              |  |                  |                                                                                            |                              |  |
| Latitude:                                                                                                                                                                                                                                                                                                                                                                          |  | Longitude        |                                                                                            | Altitude (M)                 |  |
| Local name of plant & Language                                                                                                                                                                                                                                                                                                                                                     |  |                  |                                                                                            | Variety/ type                |  |
| Seed source                                                                                                                                                                                                                                                                                                                                                                        |  |                  |                                                                                            |                              |  |
| Plant description:<br>growth form e.g. erect, spreading, branching; height, hairiness, petal colour, fruit, leaves, other observations e.g. pests and diseases                                                                                                                                                                                                                     |  |                  |                                                                                            |                              |  |
| Germination type: (Direct seeding, spontaneous/ tolerated, transplanting)                                                                                                                                                                                                                                                                                                          |  |                  | Frequency/ abundance (e.g rare, occasional, abundant)                                      |                              |  |
| Topography of landscape (flatland, valley bottom, hill/ridge side, hill/ridge top, undulating land)                                                                                                                                                                                                                                                                                |  |                  | Habitat e.g. Kitchen garden, main farm, bushland, wooded grassland, swamp, riverine, other |                              |  |
| Gradient/ slope (%)                                                                                                                                                                                                                                                                                                                                                                |  |                  | Soil type – colour, texture (sandy, loamy, clay, rocky)                                    |                              |  |
| Associated plant species (local, English, French or scientific names)                                                                                                                                                                                                                                                                                                              |  |                  |                                                                                            |                              |  |
| Plant uses e.g. food, income, medicine.                                                                                                                                                                                                                                                                                                                                            |  |                  |                                                                                            |                              |  |
| Other observations (e.g. <u>cultural beliefs</u> ; <u>agronomic &amp; management practices</u> -irrigation, monoculture, mixed; harvesting type, frequency, inputs, disease and pest management; processing; <u>horticultural traits</u> e.g. water stress tolerance, pest resistance, yield, seed selection, storage; domestication; <u>nutritional traits/ health benefits</u> ) |  |                  |                                                                                            |                              |  |
| Contact details of respondent (mobile number)                                                                                                                                                                                                                                                                                                                                      |  |                  |                                                                                            |                              |  |
