# Supplementary material for: A roadmap for breeding orphan leafy vegetable species: a case study of Gynandropsis gynandra (Cleomaceae)
Source: PubMed Central journal article supplement (PMC5798814; doi:10.1038/s41438-017-0001-2), 2018-01-10
Supplement: 41438_2017_1_MOESM2_ESM.pdf [file 41438_2017_1_MOESM2_ESM.pdf]

Utilizing the genome of the vegetable species *Cleome gynandra* for the development of improved cultivars for the West and East African markets

**CHARACTERIZATION RECORD SHEET**  
(Descriptors for *Gynandropsis gynandra*)

---

Crop/ species: *Cleome gynandra* [*Gynandropsis gynandra*]  
Characterization by: ..... Date: .....  
Cultivated/spontaneous: ..... Location/ site: .....  
Plot No. : ..... Accession No. : .....  
Sowing Date: ..... Other plant name: .....  
Transplanting Date: ..... Age (weeks): .....  
Origin of seed: .....

**SEEDLING DATA**

1. **Germination period** \_\_\_\_\_  
(no. of days from sowing to first germination)
  
2. **Anthocyanin coloration of hypocotyl** \_\_\_\_\_  
(when the seedling primary leaves are fully opened and the terminal bud is around 5 mm)  
0 = Absent    1 = Present    X = Mixture
  
3. **Hypocotyl color intensity** \_\_\_\_\_  
3 = Light    5 = Medium    7 = Dense    X = Mixture

**VEGETATIVE DATA**

4. **Plant height (cm) (N=10)** \_\_\_\_\_  
(to be measured at the same time for all the accessions 6 to 10 weeks after sowing)  
\_\_\_\_\_
  
5. **Stem diameter at the first branch (mm) (N=10)** \_\_\_\_\_  
\_\_\_\_\_
  
6. **Growth habit** \_\_\_\_\_  
3 = Upright (*erect narrow crown*)    5 = Intermediate    7 = Spreading (*wide*)    7  
= Prostrate    X = Mixture
  
7. **Branching habit** \_\_\_\_\_

0 = None    3 = Sparse (<= 5)    5 = Intermediate (6-10)    7 = Abundant (> 10)  
X = Mixture

8. **Color of main stem** (*Scale from 0=entirely green to 5= entirely purple*) (N=10) \_\_\_\_\_  
\_\_\_\_\_
9. **Stem hairiness**  
3 = Glabrous    5 =Scantly hairy    7 = Moderately hairy    9 = Very hairy or woolly \_\_\_\_\_
10. **Leaf blade leaflets** (*dominant number of leaflets per leaf, excluding inflorescence*) \_\_\_\_\_  
3 = Very low (3 leaflets)    5 = Low (4 leaflets)    7 = Intermediate (5 leaflets)  
9 = High (6 leaflets)    11= Very high (7 leaflets)    X = Mixture
11. **Leaf color** \_\_\_\_\_  
3 = Light green    5 = Green    7 = Dark green    X = Mixture
12. **Terminal leaflet shape** \_\_\_\_\_  
3 = Elliptic    5 = Ovate    7 = Lanceolate    9 = Obovate    11 = Oblanceolate  
13 = Deltoid    15 = Spatulate    X = Mixture
13. **Terminal leaflet length** (cm) (N=10)\* \_\_\_\_\_  
\_\_\_\_\_
14. **Terminal leaflet width** (cm) (N=10)\* \_\_\_\_\_  
\_\_\_\_\_
15. **Petiole length** (cm) (N=10)\* \_\_\_\_\_  
\_\_\_\_\_
16. **Leaf area** (cm<sup>2</sup>) (N=10)\* \_\_\_\_\_  
\_\_\_\_\_
17. **Leaf pubescence/ hairiness on upper surface** \_\_\_\_\_  
3 = Not hairy/scabrous    5 = Sparsely hairy    7 = Hairy    9 = Densely hairy  
X = Mixture
18. **Color of petiole** \_\_\_\_\_  
1 = Green    3 = Green tinged purple    5 = Purple tinged green    7 = Purple
19. **Oiliness / wax level on leaves and stems** \_\_\_\_\_  
3 = None    5 = Fairly waxy    7 = Very oily/sticky
20. **Upper surface veins** \_\_\_\_\_  
3 = Not depressed    5 = Slightly depressed    7 = Highly depressed

**INFLORESCENCE DATA**

21. **Flowering date** (N=10) \_\_\_\_\_  
\_\_\_\_\_
22. **Flower color** (when fully opened) \_\_\_\_\_  
1 = White      2 = Yellow      3 = Orange  
4 = Red      5 = Rose-red      6 = Pink  
7 = Purple      8 = Cream      X = Mixture
23. **Length of filament** (cm) (N=10) \_\_\_\_\_  
\_\_\_\_\_
24. **Length of gynophore** (mm) (N=10) \_\_\_\_\_  
\_\_\_\_\_
25. **Length of androphore** (mm) (N=10) \_\_\_\_\_  
\_\_\_\_\_
26. **Length of pedicel** (mm) (N=10) \_\_\_\_\_  
\_\_\_\_\_

**FRUIT & SEED DATA**

- First seed harvest date \_\_\_\_\_  
Last seed harvest date \_\_\_\_\_
27. **Days to fruiting** (no. of days from sowing to mature pods) (N=10) \_\_\_\_\_  
\_\_\_\_\_
28. **Pod length** (mm) (N=10) \_\_\_\_\_  
\_\_\_\_\_
29. **Pod width** (mm) (N=10) \_\_\_\_\_  
\_\_\_\_\_
30. **Immature pod color** \_\_\_\_\_  
1 = Green    3 = Green purple    5 = Light purple    7 = Purple
31. **Mature pod color (not dry, bearing mature seeds)** \_\_\_\_\_  
3 = Green    5 = Yellow-green    7 = Yellow    9 = Brown    X = Other
32. **Shape of cross-section of mature or nearly mature fruit** \_\_\_\_\_  
3 = Rounded, 5 = Elliptic/oblong

33. **Pod surface** \_\_\_\_\_  
3 = Shiny smooth    5 = Slightly rough    7 = Scabrid (v. rough)

34. **Pod shape** \_\_\_\_\_  
1 = No folds (regular)    3 = With few folds    5 = With many folds

35. **Color of mature healthy seeds** \_\_\_\_\_  
3 = Black    5 = Grey    7 = Other

36. **1000-seeds weight (mg)** \_\_\_\_\_  
*Weigh 8 samples of 100 seeds separately- the coefficient of variation should be inferior to 4 in order to consider the average weight – multiply the average weight by 10*  
\_\_\_\_\_

**YIELD DATA**

37. **Total biomass (g)** \_\_\_\_\_  
\_\_\_\_\_

38. **Edible biomass (g)** \_\_\_\_\_  
\_\_\_\_\_

39. **Leaf dry matter content (%)** \_\_\_\_\_  
\_\_\_\_\_

Remarks (Observation of insect pests or diseases/special forms of flowers etc. )
